# Supplementary material for: Metabolomic Profiling Reveals a Role for Androgen in Activating Amino Acid Metabolism and Methylation in Prostate Cancer Cells
Source: PubMed Central journal article supplement (PMC3138744; doi:10.1371/journal.pone.0021417), 2011-07-18
Supplement: pone.0021417.s003.pdf [file pone.0021417.s003.pdf]

# Figure S3

| NO | PCa cell line_ARD vs ANR*       | AR24 | AR48 | NvT | TvM |
|----|---------------------------------|------|------|-----|-----|
| 1  | NICOTINAMIDE DINUCLEOTIDE (NAD) | C    | C    | C   | C   |
| 2  | S-ADENOSYLMETHIONINE (SAM)      | C    | C    | C   | C   |
| 3  | HOMOCYSTEINE                    | C    | C    | C   | NC  |
| 4  | CREATININE                      | C    | C    | C   | NC  |
| 5  | ASPARAGINE                      | C    | C    | NC  | C   |
| 6  | SERINE                          | C    | C    | NC  | C   |
| 7  | GLUTAMIC ACID                   | C    | C    | NC  | NC  |
| 8  | THREONINE                       | C    | C    | NC  | NC  |
| 9  | BETAINE                         | C    | C    | ND  | ND  |
| 10 | PHENACETURIC ACID               | C    | C    | ND  | ND  |
| 11 | HISTIDINE                       | C    | NC   | C   | C   |
| 12 | TRYPTOPHAN                      | C    | NC   | C   | C   |
| 13 | HYPOXANTHINE                    | C    | ND   | C   | NC  |
| 14 | CREATINE                        | C    | NC   | ND  | ND  |
| 15 | ALANINE                         | C    | ND   | NC  | NC  |
| 16 | N1-ACETYLSPERMINE               | C    | ND   | ND  | ND  |
| 17 | ASPARTIC ACID                   | NC   | C    | C   | NC  |
| 18 | TYROSINE                        | NC   | C    | C   | NC  |
| 19 | LYSINE                          | NC   | C    | NC  | C   |
| 20 | XANTHINE                        | ND   | C    | NC  | NC  |
| 21 | BENZOIC ACID                    | NC   | C    | ND  | ND  |
| 22 | UROCANIC ACID                   | ND   | C    | ND  | ND  |
| 23 | GUANINE                         | NC   | C    | NC  | NC  |
| 24 | 1-METHYL-L-TRYPTOPHAN           | ND   | C    | ND  | ND  |
| 25 | AMINOBUTYRIC ACID               | ND   | C    | ND  | ND  |
| 26 | THYMIDINE                       | NC   | C    | ND  | ND  |
| 27 | LEUCINE                         | NC   | NC   | C   | C   |
| 28 | OLEIC ACID                      | ND   | ND   | C   | C   |
| 29 | PHENYLALANINE                   | NC   | NC   | C   | C   |
| 30 | SPERMINE                        | NC   | NC   | C   | C   |
| 31 | URACIL                          | NC   | NC   | C   | C   |
| 32 | HISTAMINE                       | ND   | ND   | C   | C   |
| 33 | KYNURENINE                      | ND   | NC   | C   | C   |
| 34 | SPERMIDINE                      | NC   | NC   | C   | NC  |
| 35 | ADENINE                         | ND   | NC   | C   | NC  |
| 36 | KYNURENIC ACID                  | ND   | NC   | NC  | C   |
| 37 | PIPECOLIC ACID                  | ND   | ND   | NC  | C   |
| 38 | THYMINE                         | ND   | ND   | NC  | C   |
| 39 | ADENOSINE                       | ND   | NC   | NC  | NC  |
| 40 | CITRULLINE                      | NC   | ND   | NC  | NC  |
| 41 | ARGININE                        | NC   | NC   | ND  | ND  |
| 42 | HIPPURIC ACID                   | ND   | ND   | NC  | NC  |
| 43 | B-HYDROXYISOVALERIC ACID        | NC   | NC   | ND  | ND  |

Key

**C** : Concordant

**NC**: Non-concordant

**ND**: Not detected

**PCa cell line\_ARD vs ANR**: AR responsive vs non-responsive PCa cell line-derived metabolic signature

**AR24**: Metabolic signature in VCaP cells treated with 10 nM R1881 for 24h

**AR48**: Metabolic signature in VCaP cells treated with 10 nM R1881 for 48h

**NvT**: Metabolic signature in localized PCa

**TvM**: Metabolic signature in metastatic disease

\* Only 43/53 compounds that were detected in atleast one of the four data sets are listed
