# Supplementary material for: Metabolomic Profiling Reveals a Role for Androgen in Activating Amino Acid Metabolism and Methylation in Prostate Cancer Cells
Source: PubMed Central journal article supplement (PMC3138744; doi:10.1371/journal.pone.0021417), 2011-07-18
Supplement: pone.0021417.s005.pdf [file pone.0021417.s005.pdf]

# Table S1

| Group Type                  | Group Name                                                                     | P-Value  | Q-Value  |
|-----------------------------|--------------------------------------------------------------------------------|----------|----------|
| Literature-defined Concepts | Experimental Drug Targets                                                      | 2.90E-23 | 1.91E-20 |
| KEGG Pathway                | Glutamate metabolism                                                           | 8.10E-19 | 6.87E-17 |
| KEGG Pathway                | Alanine and aspartate metabolism                                               | 5.50E-19 | 9.27E-17 |
| KEGG Pathway                | Arginine and proline metabolism                                                | 9.90E-16 | 5.58E-14 |
| KEGG Pathway                | Urea cycle and metabolism of amino groups                                      | 1.40E-15 | 5.75E-14 |
| GO Molecular Function       | ligase activity                                                                | 2.70E-12 | 5.6E-09  |
| GO Biological Process       | amino acid metabolism                                                          | 2.10E-11 | 3.82E-08 |
| KEGG Pathway                | Aminoacyl-tRNA biosynthesis                                                    | 1.30E-09 | 4.49E-08 |
| GO Biological Process       | glutamine metabolism                                                           | 1.30E-10 | 1.21E-07 |
| Biocarta Pathway            | Catabolic Pathways for Arginine , Histidine, Glutamate, Glutamine, and Proline | 6.00E-09 | 1.57E-06 |
| GO Biological Process       | protein biosynthesis                                                           | 4.30E-09 | 2.66E-06 |
| InterPro                    | Aminoacyl-transfer RNA synthetase, class II                                    | 2.00E-08 | 9.33E-05 |
| GO Cellular Component       | cytoplasm                                                                      | 4.60E-06 | 0.00201  |
| GO Biological Process       | proline biosynthesis                                                           | 5.70E-06 | 0.002621 |
| GO Molecular Function       | 5-nucleotidase activity                                                        | 5.70E-06 | 0.005931 |
| GO Molecular Function       | transaminase activity                                                          | 5.70E-06 | 0.005931 |
| HPRD Interaction Sets       | KARS                                                                           | 6.10E-06 | 0.00665  |
| HPRD Interaction Sets       | SCYE1                                                                          | 6.10E-06 | 0.00665  |
| HPRD Interaction Sets       | MARS                                                                           | 6.10E-06 | 0.00665  |
| HPRD Interaction Sets       | IARS                                                                           | 6.10E-06 | 0.00665  |
| HPRD Interaction Sets       | QARS                                                                           | 6.10E-06 | 0.00665  |
| GO Biological Process       | amino acid biosynthesis                                                        | 1.90E-05 | 0.006963 |
| InterPro                    | Aminoacyl-tRNA synthetase, class I                                             | 3.20E-06 | 0.007609 |
| InterPro                    | Pyridoxal-dependent decarboxylase                                              | 5.50E-06 | 8.63E-03 |
| HPRD Interaction Sets       | LARS                                                                           | 2.80E-06 | 0.015185 |
| HPRD Interaction Sets       | EEF1E1                                                                         | 2.80E-06 | 0.015185 |
| HPRD Interaction Sets       | RARS                                                                           | 2.80E-06 | 0.015185 |
| HPRD Interaction Sets       | EPRS                                                                           | 2.80E-06 | 0.015185 |
