# Supplementary material for: Metabolomic Profiling Reveals a Role for Androgen in Activating Amino Acid Metabolism and Methylation in Prostate Cancer Cells
Source: PubMed Central journal article supplement (PMC3138744; doi:10.1371/journal.pone.0021417), 2011-07-18
Supplement: pone.0021417.s006.pdf [file pone.0021417.s006.pdf]

**Table S2**

| Group Type                  | Group Name                                                                     | P-Value | Q-Value  |
|-----------------------------|--------------------------------------------------------------------------------|---------|----------|
| Literature-defined Concepts | Experimental Drug Targets                                                      | 0.000   | 1.91E-20 |
| KEGG Pathway                | Alanine and aspartate metabolism                                               | 0.000   | 9.27E-17 |
| KEGG Pathway                | Glutamate metabolism                                                           | 0.000   | 6.87E-17 |
| KEGG Pathway                | Arginine and proline metabolism                                                | 0.000   | 5.58E-14 |
| KEGG Pathway                | Urea cycle and metabolism of amino groups                                      | 0.000   | 5.75E-14 |
| GO Molecular Function       | ligase activity                                                                | 0.000   | 5.6E-09  |
| GO Biological Process       | amino acid metabolism                                                          | 0.000   | 3.82E-08 |
| GO Biological Process       | glutamine metabolism                                                           | 0.000   | 1.21E-07 |
| KEGG Pathway                | Aminoacyl-tRNA biosynthesis                                                    | 0.000   | 4.49E-08 |
| GO Biological Process       | protein biosynthesis                                                           | 0.000   | 2.66E-06 |
| Biocarta Pathway            | Catabolic Pathways for Arginine , Histidine, Glutamate, Glutamine, and Proline | 0.000   | 1.57E-06 |
| InterPro                    | Aminoacyl-transfer RNA synthetase, class II                                    | 0.000   | 9.33E-05 |
| HPRD Interaction Sets       | RARS                                                                           | 0.000   | 0.015185 |
| HPRD Interaction Sets       | EPRS                                                                           | 0.000   | 0.015185 |
| HPRD Interaction Sets       | EEF1E1                                                                         | 0.000   | 0.015185 |
| HPRD Interaction Sets       | LARS                                                                           | 0.000   | 0.015185 |
| InterPro                    | Aminoacyl-tRNA synthetase, class I                                             | 0.000   | 0.007609 |
| GO Cellular Component       | cytoplasm                                                                      | 0.000   | 0.00201  |
| InterPro                    | Pyridoxal-dependent decarboxylase                                              | 0.000   | 8.63E-03 |
| GO Biological Process       | proline biosynthesis                                                           | 0.000   | 0.002621 |
| GO Molecular Function       | transaminase activity                                                          | 0.000   | 0.005931 |
| GO Molecular Function       | 5-nucleotidase activity                                                        | 0.000   | 0.005931 |
| HPRD Interaction Sets       | IARS                                                                           | 0.000   | 0.00665  |
| HPRD Interaction Sets       | QARS                                                                           | 0.000   | 0.00665  |
| HPRD Interaction Sets       | MARS                                                                           | 0.000   | 0.00665  |
| HPRD Interaction Sets       | SCYE1                                                                          | 0.000   | 0.00665  |
| HPRD Interaction Sets       | KARS                                                                           | 0.000   | 0.00665  |
| HPRD Interaction Sets       | DARS                                                                           | 0.000   | 0.006472 |
| Oncomine gene expression    | Normal Type - Top 5% over-expressed in Liver (Su)                              | 0.000   | 0.080861 |
| InterPro                    | Anticodon-binding                                                              | 0.000   | 0.021505 |
| GO Biological Process       | amino acid biosynthesis                                                        | 0.000   | 0.006963 |
| Literature-defined Concepts | Down-regulated genes in renal cell carcinoma                                   | 0.000   | 0.010441 |
| KEGG Pathway                | Glycine, serine and threonine metabolism                                       | 0.000   | 1.08E-03 |
| Oncomine gene expression    | Liver Type - Top 10% under-expressed in Metastasis to Liver (Chen)             | 0.000   | 7.22E-02 |
| InterPro                    | tRNA synthetase, class II (G, H, P and S)                                      | 0.000   | 0.04354  |
| Oncomine Clusters           | Co-expressed across 64 Lymphoma samples (Rosenwald_Lymphoma_2)                 | 0.000   | 0.134721 |
| InterPro                    | Glutamine amidotransferase, class-II                                           | 0.000   | 5.84E-02 |
| InterPro                    | ATP:guanido phosphotransferase                                                 | 0.000   | 5.84E-02 |
| InterPro                    | Aminotransferase, class V                                                      | 0.000   | 5.84E-02 |
