# Supplementary material for: Metabolomic Profiling Reveals a Role for Androgen in Activating Amino Acid Metabolism and Methylation in Prostate Cancer Cells
Source: PubMed Central journal article supplement (PMC3138744; doi:10.1371/journal.pone.0021417), 2011-07-18
Supplement: pone.0021417.s008.pdf [file pone.0021417.s008.pdf]

Table S4

| Group Type                                 | Group Name                                                                             | P-Value         | Q-Value            |
|--------------------------------------------|----------------------------------------------------------------------------------------|-----------------|--------------------|
| <b>GO Molecular Function</b>               | <b>methyltransferase activity</b>                                                      | <b>1.90E-08</b> | <b>3.86515E-05</b> |
| <b>GO Cellular Component</b>               | <b>nucleus</b>                                                                         | <b>3.90E-07</b> | <b>0.000170133</b> |
| <b>InterPro</b>                            | <b>Nuclear protein SET</b>                                                             | <b>2.20E-07</b> | <b>0.001040343</b> |
| <b>KEGG Pathway</b>                        | <b>Nicotinate and nicotinamide metabolism</b>                                          | <b>2.30E-05</b> | <b>0.003830887</b> |
| <b>KEGG Pathway</b>                        | <b>Methionine metabolism</b>                                                           | <b>6.50E-05</b> | <b>0.005532044</b> |
| Conserved UTR Motif                        | CLUSTER_7__MIR-29C MIR-29B MIR-29A MIR196                                              | 6.70E-04        | 0.047902318        |
| <b>GO Molecular Function</b>               | <b>DNA binding</b>                                                                     | <b>1.60E-04</b> | <b>0.169526443</b> |
| <b>GO Molecular Function</b>               | <b>zinc ion binding</b>                                                                | <b>1.60E-04</b> | <b>0.169526443</b> |
| <b>InterPro</b>                            | <b>SET-related region</b>                                                              | <b>7.80E-05</b> | <b>0.184952092</b> |
| <b>Oncomine Gene Expression Signatures</b> | <b>Localized Prostate Carcinoma PCa ETS - Top 20% over-expressed in ERG+ (xiaojun)</b> | <b>6.50E-05</b> | <b>0.363401091</b> |
| KEGG Pathway                               | Purine metabolism                                                                      | 0.01            | 0.422128373        |
| KEGG Pathway                               | Selenoamino acid metabolism                                                            | 0.01            | 5.41E-01           |
| GO Molecular Function                      | histone-lysine N-methyltransferase activity                                            | 0.001           | 0.544517978        |
| GO Biological Process                      | chromatin modification                                                                 | 4.20E-04        | 0.765878138        |
| Oncomine Gene Expression Signatures        | CellLine Vinblastine-newanalysis - Top 20% under-expressed in Indeterminate, Resi      | 9.00E-04        | 8.40E-01           |
| Transfac TF Matrix - 1000bp                | XFD-3                                                                                  | 0.01            | 0.89845999         |
| Transfac TF Matrix - 1000bp                | NF-muE1                                                                                | 0.003           | 0.927962342        |
| GO Molecular Function                      | magnesium ion binding                                                                  | 0.002           | 0.933790176        |
| Transfac TF Matrix - 1000bp                | YY1                                                                                    | 0.005           | 0.962902402        |
| GO Molecular Function                      | transferase activity                                                                   | 0.003           | 1.01E+00           |
| picTar predicted miRNA target genes        | HSA-MIR-29B                                                                            | 0.006           | 1.045814262        |
| picTar predicted miRNA target genes        | HSA-MIR-29C                                                                            | 0.006           | 1.045814262        |
| Oncomine Gene Expression Signatures        | Prostate SPINK1 - Top 10% over-expressed in SPINK1 (LaTulippe)                         | 0.002           | 1.059810563        |
| Oncomine Gene Expression Signatures        | Glioma Grade - Top 5% over-expressed in 4 (Rickman)                                    | 0.001           | 1.08E+00           |
| Oncomine Gene Expression Signatures        | Gastric Carcinoma H. Pyroli status - Top 10% under-expressed in positive (Leung)       | 0.002           | 1.09E+00           |
| Oncomine Gene Expression Signatures        | Parathyroid Type - Top 5% under-expressed in Nonfamilial Multiple Gland Neoplasia      | 0.002           | 1.09E+00           |
| Oncomine Gene Expression Signatures        | Ovarian Carcinoma Histologic Subtype - Top 10% under-expressed in Mucinous (Sch        | 0.003           | 1.10E+00           |
| Oncomine Gene Expression Signatures        | Localized Prostate Carcinoma PCa ETS - Top 10% over-expressed in ERG+ (xiaojun)        | 7.90E-04        | 1.107844412        |
| Oncomine Gene Expression Signatures        | Prostate SPINK1 - Top 5% under-expressed in SPINK1 (Vanaja)                            | 0.002           | 1.136350429        |
| Transfac TF Matrix - 1000bp                | KROX                                                                                   | 0.01            | 1.15E+00           |
| Oncomine Gene Expression Signatures        | CellLine Daunorubicin - Top 20% under-expressed in Resistant (Shankavaram)             | 6.30E-04        | 1.18E+00           |
| Oncomine Gene Expression Signatures        | Parathyroid Type - Top 10% under-expressed in Nonfamilial Multiple Gland Neoplas       | 0.003           | 1.180091663        |
| Oncomine Gene Expression Signatures        | Ovary Type - Top 5% under-expressed in Ovarian Metastasis to Omentum (Adib)            | 0.003           | 1.24E+00           |
| Oncomine Gene Expression Signatures        | Brain Type - Top 5% under-expressed in Astrocytoma (Shai)                              | 0.003           | 1.24E+00           |
| Oncomine Gene Expression Signatures        | Bladder Grade - Top 20% over-expressed in High Grade (Dyrskjot)                        | 0.004           | 1.32E+00           |
| Oncomine Gene Expression Signatures        | Germ Cell Type - Top 10% under-expressed in Seminoma (Sperger)                         | 0.004           | 1.32E+00           |
| Oncomine Gene Expression Signatures        | Esophageal Squamous Cell Carcinoma Family history of cancer - Top 10% over-expre       | 5.00E-04        | 1.412679118        |
| Oncomine Gene Expression Signatures        | Prostate ETS Status - Top 20% over-expressed in ERG+ (xiaojun)                         | 0.006           | 1.63E+00           |
| Conserved Promoter Motif                   | CLUSTER_7__V\$AP1_C                                                                    | 0.009           | 1.641197672        |
| Oncomine Gene Expression Signatures        | Melanoma Type - Top 20% over-expressed in Lymph Node Metastasis, Metastatic Gr         | 0.01            | 1.66E+00           |
| Oncomine Gene Expression Signatures        | Cancer Type - v1 - Top 10% over-expressed in Endometrial Endometrioid Carcinoma        | 0.009           | 1.664373194        |
| Oncomine Gene Expression Signatures        | Cancer Type - v1 - Top 10% over-expressed in Metastatic Ovarian Carcinoma (Bittner     | 0.009           | 1.70E+00           |
| Oncomine Gene Expression Signatures        | Normal Type - Top 5% over-expressed in Uterus (Shyamsundar)                            | 0.008           | 1.736146304        |
| Oncomine Gene Expression Signatures        | Breast Type - Top 10% under-expressed in Breast Carcinoma (Finak)                      | 0.009           | 1.75E+00           |
| Oncomine Gene Expression Signatures        | Diffuse Large B-cell Lymphoma Subtype - Top 5% over-expressed in Activated B-Cell      | 0.008           | 1.76E+00           |
| Oncomine Gene Expression Signatures        | Sarcoma Type - Top 10% under-expressed in chondroblastoma (Henderson)                  | 0.009           | 1.76E+00           |
| Oncomine Gene Expression Signatures        | B-cell Chronic Lymphocytic Leukemia Disease Status - Top 10% under-expressed in P      | 0.007           | 1.781038862        |
| Oncomine Gene Expression Signatures        | Breast Type - Top 5% under-expressed in Breast Carcinoma (Finak)                       | 0.008           | 1.79E+00           |
| Oncomine Gene Expression Signatures        | Acute Myeloid Leukemia Karyotype - Top 10% over-expressed in -7 (Oshima)               | 0.009           | 1.80E+00           |
| Oncomine Gene Expression Signatures        | Normal Type - Top 10% over-expressed in Testis (Su)                                    | 0.009           | 1.80E+00           |
| Oncomine Gene Expression Signatures        | CellLine taxotere-newanalysis - Top 20% under-expressed in Resistant (Staunton)        | 0.007           | 1.82E+00           |
| Oncomine Gene Expression Signatures        | Bladder Patient status A/D - Top 10% under-expressed in DOD (Modlich)                  | 0.007           | 1.829243916        |
| Oncomine Gene Expression Signatures        | CellLine Daunorubicin - Top 5% under-expressed in Resistant (Shankavaram)              | 0.007           | 1.91E+00           |
| Literature-defined Concepts                | Genes expressed only in human embryonic stem cells as compared to hematopoieti         | 0.005           | 3.395497156        |
| <b>InterPro</b>                            | <b>Pre-SET</b>                                                                         | <b>0.007</b>    | <b>1.11E+01</b>    |
| Oncomine Clusters                          | Co-expressed across 16 Breast samples (Weigelt_Breast)                                 | 0.008           | 14.52639303        |
| Oncomine Clusters                          | Co-expressed across 24 Breast samples (Chang_Breast)                                   | 0.007           | 16.73446596        |
| Connectivity Map                           | MCF Cells Treatment - Top 5% under-expressed in 506, MCF7 treated with valproic a      | 0.009           | 27.62173097        |
| Connectivity Map                           | CellLine Batch - description - Top 5% under-expressed in 109, SKMEL5 treated with n    | 0.009           | 27.62173097        |
