# Supplementary material for: Metabolomic Profiling Reveals a Role for Androgen in Activating Amino Acid Metabolism and Methylation in Prostate Cancer Cells
Source: PLOS journal article supplement (doi:10.1371/journal.pone.0021417), 2011-07-18
Supplement: S4 (10.1371/journal.pone.0021417.s004) [file journal.pone.0021417.s004]

**Figure S4**

Top 20 % genes  
overexpressed in  
ERG + ve PCa

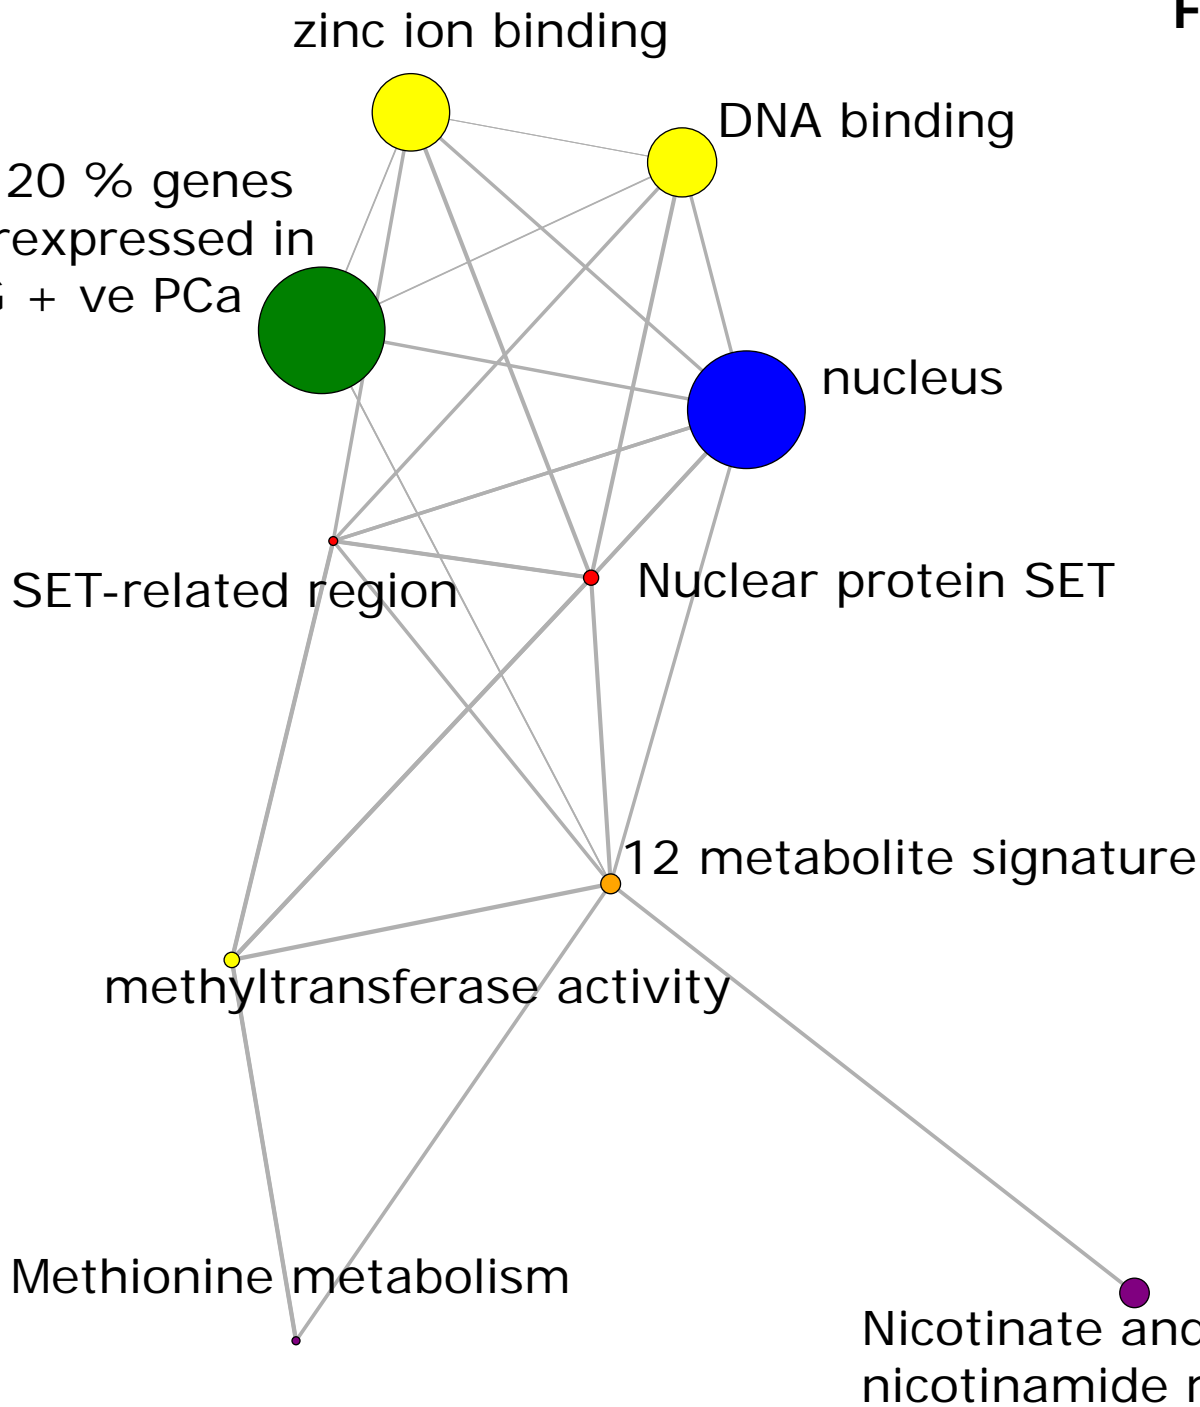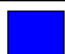

GO Cellular component

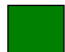

Oncomine gene expression signature

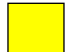

GO Molecular function

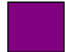

KEGG pathway

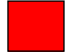

InterPro

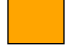

12 metabolite signature concordant between PCa cell lines  
and tissues (organ confined and metastatic)
